# Supplementary material for: D1- and D2-like receptors differentially mediate the effects of dopaminergic transmission on cost–benefit evaluation and motivation in monkeys
Source: PubMed Central journal article supplement (PMC8248602; doi:10.1371/journal.pbio.3001055), 2021-07-01
Supplement: pbio.3001055.s001.pdf [file pbio.3001055.s001.pdf]

| D1R block (monkey KN)                            |              |              |
|--------------------------------------------------|--------------|--------------|
| model                                            | BIC          | $\Delta$ BIC |
| #1 $E = 1/a(\text{cond})R$                       | -85.6        | 9.9          |
| <b>#2 <math>E = 1/a(\text{cond})R + e</math></b> | <b>-95.5</b> | <b>0</b>     |
| #3 $E = 1/aR + e(\text{cond})$                   | -93.6        | 1.9          |
| #4 $E = 1/a(\text{cond})R + e(\text{cond})$      | -92.6        | 2.9          |

| D1R block (monkey ST)                        |               |              |
|----------------------------------------------|---------------|--------------|
| model                                        | BIC           | $\Delta$ BIC |
| <b>#1 <math>E = 1/a(\text{cond})R</math></b> | <b>-110.6</b> | <b>0</b>     |
| #2 $E = 1/a(\text{cond})R + e$               | -98           | 12.6         |
| #3 $E = 1/aR + e(\text{cond})$               | -92.4         | 18.2         |
| #4 $E = 1/a(\text{cond})R + e(\text{cond})$  | -95           | 15.6         |

| D2R block (monkey KN)                        |               |              |
|----------------------------------------------|---------------|--------------|
| model                                        | BIC           | $\Delta$ BIC |
| <b>#1 <math>E = 1/a(\text{cond})R</math></b> | <b>-126.7</b> | <b>0</b>     |
| #2 $E = 1/a(\text{cond})R + e$               | -120.7        | 6            |
| #3 $E = 1/aR + e(\text{cond})$               | -103.6        | 23.1         |
| #4 $E = 1/a(\text{cond})R + e(\text{cond})$  | -117.4        | 9.3          |

| D2R block (monkey ST)                        |               |              |
|----------------------------------------------|---------------|--------------|
| model                                        | BIC           | $\Delta$ BIC |
| <b>#1 <math>E = 1/a(\text{cond})R</math></b> | <b>-151.7</b> | <b>0</b>     |
| #2 $E = 1/a(\text{cond})R + e$               | -138.8        | 12.9         |
| #3 $E = 1/aR + e(\text{cond})$               | -124.2        | 27.5         |
| #4 $E = 1/a(\text{cond})R + e(\text{cond})$  | -135.4        | 16.3         |
