# Supplementary material for: D1- and D2-like receptors differentially mediate the effects of dopaminergic transmission on cost–benefit evaluation and motivation in monkeys
Source: PubMed Central journal article supplement (PMC8248602; doi:10.1371/journal.pbio.3001055), 2021-07-01
Supplement: pbio.3001055.s002.pdf [file pbio.3001055.s002.pdf]

| Model                                    | D1 block       |              | D2 block       |              |
|------------------------------------------|----------------|--------------|----------------|--------------|
|                                          | BIC            | $\Delta$ BIC | BIC            | $\Delta$ BIC |
| #1 $E \sim Rt$                           | <b>-1476.2</b> | <b>0</b>     | <b>-1000.5</b> | <b>0</b>     |
| #2 $E \sim Rt + (Rt monkey)$             | -1435.1        | 41.1         | -988.1         | 12.4         |
| #3 $E \sim Rt + (Rt cond)$               | -1443.4        | 32.8         | -964.9         | 35.6         |
| #4 $E \sim Rt + (Rt monkey) + (Rt cond)$ | -1437          | 39.2         | -980.9         | 19.6         |
