# Supplementary material for: D1- and D2-like receptors differentially mediate the effects of dopaminergic transmission on cost–benefit evaluation and motivation in monkeys
Source: PubMed Central journal article supplement (PMC8248602; doi:10.1371/journal.pbio.3001055), 2021-07-01
Supplement: pbio.3001055.s003.pdf [file pbio.3001055.s003.pdf]

|    | model                                                       | BIC           | $\Delta$ BIC |
|----|-------------------------------------------------------------|---------------|--------------|
| #1 | $E \sim RC + E_0 + (0 + CU type)$                           | <b>4405.2</b> | <b>0</b>     |
| #3 | $E \sim RC + E_0 + (0 + CU type) + (CU monkey)$             | 4621.5        | 216.3        |
| #2 | $E \sim RC + E_0 + (0 + CU type) + (CU cond)$               | 4745.1        | 339.8        |
| #4 | $E \sim RC + E_0 + (0 + CU type) + (CU monkey) + (CU cond)$ | 4858.1        | 452.9        |
