# Supplementary material for: D1- and D2-like receptors differentially mediate the effects of dopaminergic transmission on cost–benefit evaluation and motivation in monkeys
Source: PubMed Central journal article supplement (PMC8248602; doi:10.1371/journal.pbio.3001055), 2021-07-01
Supplement: pbio.3001055.s004.pdf [file pbio.3001055.s004.pdf]

| model |                                       | D1R block     |              |               |              |
|-------|---------------------------------------|---------------|--------------|---------------|--------------|
|       |                                       | Delay         |              | Workload      |              |
|       |                                       | BIC           | $\Delta$ BIC | BIC           | $\Delta$ BIC |
| #1    | $E \sim Rt$                           | 1387.1        | 81.4         | <b>1308.2</b> | <b>0</b>     |
| #2    | $E \sim Rt + (Rt monkey)$             | <b>1305.7</b> | <b>0</b>     | 1308.6        | 0.4          |
| #3    | $E \sim Rt + (Rt cond)$               | 1374.1        | 68.4         | 1331.3        | 23.2         |
| #4    | $E \sim Rt + (Rt monkey) + (RT cond)$ | 1329.3        | 23.5         | 1324.4        | 16.3         |

| model |                                       | D2R block     |              |               |              |
|-------|---------------------------------------|---------------|--------------|---------------|--------------|
|       |                                       | Delay         |              | Workload      |              |
|       |                                       | BIC           | $\Delta$ BIC | BIC           | $\Delta$ BIC |
| #1    | $E \sim Rt$                           | 1114.8        | 38.3         | 1228.9        | 72.6         |
| #2    | $E \sim Rt + (Rt monkey)$             | <b>1076.5</b> | <b>0</b>     | 1186.2        | 30           |
| #3    | $E \sim Rt + (Rt cond)$               | 1090.7        | 14.3         | 1191.0        | 34.7         |
| #4    | $E \sim Rt + (Rt monkey) + (RT cond)$ | 1080.1        | 3.6          | <b>1156.3</b> | <b>0</b>     |
