# Supplementary material for: D1- and D2-like receptors differentially mediate the effects of dopaminergic transmission on cost–benefit evaluation and motivation in monkeys
Source: PubMed Central journal article supplement (PMC8248602; doi:10.1371/journal.pbio.3001055), 2021-07-01
Supplement: pbio.3001055.s005.pdf [file pbio.3001055.s005.pdf]

| model                                    | Delay         |              | Workload      |              |
|------------------------------------------|---------------|--------------|---------------|--------------|
|                                          | BIC           | $\Delta$ BIC | BIC           | $\Delta$ BIC |
| #1 $E \sim Rt$                           | <b>1262.2</b> | <b>0</b>     | 1390.4        | 41.2         |
| #2 $E \sim Rt + (Rt monkey)$             | 1276.8        | 14.6         | 1392.4        | 43.2         |
| #3 $E \sim Rt + (Rt cond)$               | 1266.5        | 4.3          | <b>1349.2</b> | <b>0</b>     |
| #4 $E \sim Rt + (Rt monkey) + (Rt cond)$ | 1280.1        | 17.9         | 1352.5        | 3.3          |
