# Supplementary material for: D1- and D2-like receptors differentially mediate the effects of dopaminergic transmission on cost–benefit evaluation and motivation in monkeys
Source: PubMed Central journal article supplement (PMC8248602; doi:10.1371/journal.pbio.3001055), 2021-07-01

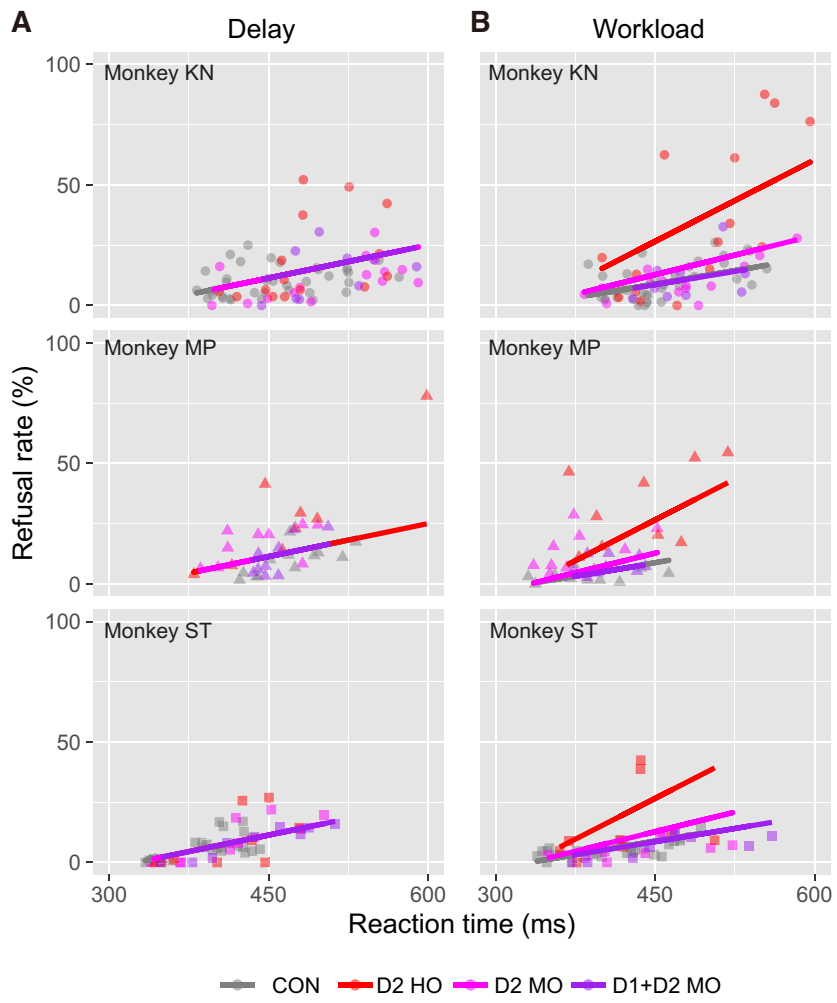

Supplement: pbio.3001055.s010.pdf [file pbio.3001055.s010.pdf]
